# Supplementary material for: Interdisziplinäre Notaufnahme: Geben Symptome und Zuweisungsweg Auskunft über den Bettenbedarf?
Source: Springer Nature journal article supplement (doi:10.1007/s10049-022-01037-5), 2022-05-12
Supplement: MOESM1 [file 20396132]

Zusatzmaterial zum Beitrag „Interdisziplinäre Notaufnahme - Geben Symptome und Zuweisungsweg Auskunft über den Bettenbedarf?“ von Völk S, Koedel U, Pedersen V et al. (2022) in *Notfall+Rechtsmedizin*.

Beitrag und Zusatzmaterial stehen Ihnen auf [www.springermedizin.de](http://www.springermedizin.de) zur Verfügung. Bitte geben Sie dort den Beitragstitel in die Suche ein.

## Zusammenfassung der Leitsymptome je Fachdisziplin

| Fachbereich               | Leitsymptom                                                                                                                                                                                                                                                                                                                                                                                                                                                                                                    |
|---------------------------|----------------------------------------------------------------------------------------------------------------------------------------------------------------------------------------------------------------------------------------------------------------------------------------------------------------------------------------------------------------------------------------------------------------------------------------------------------------------------------------------------------------|
| Innere Medizin            | Allergie und Anaphylaxie, Allgemeinzustands-Minderung, Aszites/Ödeme, Atemwegsprobleme, Bauchschmerz, Beinschwellung, Blutzucker-Entgleisung, Brustschmerz, Durchfall, Exsikkose, Fieber, Flankenschmerz, Fremdkörper, Gastrointestinale Blutung, Grippaler Infekt, Haut- oder Schleimhauterkrankung, Herzrhythmusstörung, Hypertensive Entgleisung, Ikterus, Intoxikation/Vergiftung, Miktionsprobleme, Reanimation, Sonstige internistische Beschwerden, Strom- und Blitzunfall, Synkope, Übelkeit/Erbrechen |
| Unfallchirurgie           | Arbeitsunfall, Extremitätenverletzung, Handverletzung, Nadelstichverletzung, Polytrauma, Schädel-Hirn-Trauma, Sonstige unfallchirurgische Beschwerden, Sturz mit Verletzungen, Wirbelsäulenverletzung, Wund-/Verbandskontrolle                                                                                                                                                                                                                                                                                 |
| Neurologie                | Doppelbilder, Gangstörung, Gesichtslähmung, Hemiparese, Koma, Kopfschmerz, Lähmung, Schwindel, Sehstörung, Sensibilitätsstörungen, Somnolenz/Vigilanzminderung, Sonstige neurologische Beschwerden, Sprachstörung, V.a. epileptischen Anfall                                                                                                                                                                                                                                                                   |
| Allgemeine Chirurgie      | Akute Bauchschmerzen, Akute Leisten- und Flankenschmerzen, Durchblutungsstörung Extremität/Shunt, Enddarm- und Stomabeschwerden, Haut- und Weichteilbeschwerden, Haut- und Weichteilverletzung, Katheter- und Drainagenkomplikationen, Krankenhausinterne Akutvorstellung, Krankenhauszuverlegung, Peristationäre chirurgische Beschwerden und Kontrollen, Postambulante chirurgische Beschwerden und Kontrollen, Thoraxverletzung                                                                             |
| Hals-Nasen-Ohrenheilkunde | HNO Blutung sonstige, Epistaxis, Fremdkörper, Halsschmerzen, Haut- oder Schleimhauterkrankung, Hörverlust, Nasentrauma, Ohrenscherzen, Ohrgeräusch, Sonstige HNO Beschwerden                                                                                                                                                                                                                                                                                                                                   |
| Urologie                  | Urologische Blutung sonstige, Dauerkatheter-Wechsel, Flankenschmerz, Fremdkörper urologisch, Haut- oder Schleimhauterkrankung, Hodenschmerz, Miktionsprobleme, Sonstige urologische Beschwerden                                                                                                                                                                                                                                                                                                                |
| Orthopädie                | Gelenkbeschwerden, Muskuläre Beschwerden, Rückenschmerz mit radikulären Symptomen, Rückenschmerz ohne radikuläre Symptome, Sonstige orthopädische Beschwerden, Wund-/Verbandskontrolle                                                                                                                                                                                                                                                                                                                         |
| Gynäkologie               | Aszites/Ödeme, Bauchschmerz, Fremdkörper, Gynäkologische Blutung, Haut- oder Schleimhauterkrankung, Miktionsprobleme, Pille danach, Schwangerschaftskomplikation, Sonstige gynäkologische Beschwerden, Vergewaltigung                                                                                                                                                                                                                                                                                          |
| Neurochirurgie            | Allgemeinzustands-Minderung, Vernichtungskopfschmerz, Rückenschmerz mit radikulären Symptomen, Shunt-Dysfunktion, Sonstige neurochirurgische Beschwerden, Wundheilungsstörung                                                                                                                                                                                                                                                                                                                                  |
